# Supplementary material for: Increased serum phenylalanine/tyrosine ratio associated with the psychiatric symptom of anti-NMDAR encephalitis
Source: Front Neurol. 2024 Oct 9;15:1434139. doi: 10.3389/fneur.2024.1434139 (PMC11500326; doi:10.3389/fneur.2024.1434139)
Supplement: Supplementary file 1 [file Table_1.xlsx]

## Sheet: Sheet1
Supplementary Table 1 Multiple reaction monitoring parameters of the analytes and internal standards
Compound	Transition (m/z)	Declustering Potential (V)	Collision Energy (eV)
Phenylalanine	166→120	85	25
d8-Phenylalanine	174.1→128.1	85	25
Tyrosine	182.1→136	45	25
d2-Tyrosine	184.1→138	45	25
